# Supplementary material for: Epidemiology and impact on all-cause mortality of sepsis in Norwegian hospitals: A national retrospective study
Source: PLoS One. 2017 Nov 17;12(11):e0187990. doi: 10.1371/journal.pone.0187990 (PMC5693291; doi:10.1371/journal.pone.0187990)
Supplement: S1 Dataset — (XLSX) [file pone.0187990.s002.xlsx]

## Sheet: Sheet1
Age (years)	Sex (0 male, 1 female)	Length of stay (days)	Hospital outcome (0 alive, 1 dead)	Episode number	ICD-10 1	ICD-10 2	ICD-10 3	ICD-10 4	ICD-10 5	ICD-10 6	ICD-10 7	ICD-10 8	ICD-10 9
21	1	1	0	1		J159
20	1	5	0	1	J158
21	1	3	0	1	J157	E86
77	0	18	0	1		J159
72	0	9	0	1	A415	I509	A418	K810
83	0	18	0	1	A415
74	0	28	0	1		K81
74	1	2	0	1	J159
69	0	7	0	1
53	1	1	0	1	A46
72	1	2	0	1		J159
82	0	2	0	1	J159
82	0	4	0	2	J159
83	0	4	0	3	J159
83	0	2	0	4	J159
75	1	4	0	1	A419
72	0	17	1	1		J159
45	0	4	0	1	A415
45	0	6	0	2	A415
56	1	12	0	1		A418
46	1	3	0	1	N10
48	1	2	0	1	J13
40	1	9	0	2	T814
39	0	20	0	1	T814
40	0	10	0	1	T814
56	0	46	0	1		J159
70	1	23	0	1		I509	J159	J960	A419
47	1	19	0	1	A409	K650
47	1	9	0	2	K659
46	0	3	0	1	J159
46	0	7	0	2	J159
27	1	3	0	1	A419
11	1	2	0	1	J157
91	0	6	0	1	J159
91	0	6	0	2	J159
91	0	2	0	3	J159
7	1	18	0	1	J960	A411
79	0	38	0	1	B377	A402
83	1	4	0	1	K810	E86
84	1	4	0	2	A418	N10	E86
16	1	3	0	1	A419
73	0	24	0	1	A410
17	0	18	0	1	J159	E86
17	0	13	0	2	J960	J159
18	0	5	0	3	J159
63	0	33	1	1		M726	M726	I509
40	0	15	0	1	A410
73	0	1	0	1	J159
88	1	12	0	1	J159
89	1	4	1	2	J159	E86	N179
70	0	21	0	1	J960	A410
84	0	11	0	1	J159
75	0	11	0	1	J100	I509
75	0	17	0	2		A46	I509
76	0	16	0	1	I509	J159	N179
76	0	3	0	2	J159	E86
41	0	4	0	1	A46
70	1	3	0	1	A415	N170
66	1	8	0	1		A418
79	0	3	0	1	J159
79	0	50	0	2	J159
80	0	5	1	3	J159	J960
62	1	19	0	1		J13	J960
62	1	6	0	2	J159
62	1	14	1	3	A410
20	0	21	0	1	J100	I509	R572	J159
47	1	5	0	1		J36
59	1	2	0	1	A46
55	1	10	0	1	A415
55	1	15	0	2	A418
56	1	19	1	3	A418	R572	J189
68	0	9	0	1	K650
68	0	3	0	2	J157	I509
79	0	6	0	1	N10	E86
76	1	5	0	1	A46
76	1	8	0	2	A46
33	1	2	0	1	J101
48	0	9	0	1	J155	N179	I509	R570	J960
71	1	7	0	1	J159
48	0	4	0	1	A46
8	0	8	0	1	J960	E86	J157	J189
47	0	1	0	1	J157
58	0	22	0	1	T814
53	1	3	0	1	A418	J189
40	0	4	0	1	J13
41	0	3	0	2	J960	J14
21	0	4	0	1		T814
20	0	3	0	1	J158
71	1	49	0	1	K650
72	1	17	0	2		J159
75	1	2	0	1	J159	E86
55	1	31	0	1		N10
78	1	5	0	1	J159	N10
88	0	12	0	1	J159
51	1	6	0	1	N10
63	0	1	1	1	A419	J159	J960	N179
43	0	6	0	1	A410
44	0	0	0	2	T814
44	0	2	0	3	T814
8	0	8	0	1	J159
60	0	3	1	1	J960	A400	A46	D65	N170	R572
66	0	13	0	1		T814
86	0	5	0	1	A415	N178
89	1	10	1	1	J960	J158	I509
53	0	2	0	1		J159
47	0	5	0	1	T814
61	0	19	1	1	K650	N179	T814
67	0	4	0	1	J159
57	0	2	0	1	A46
76	0	2	0	1		J159	I509
76	0	8	0	2		I509	J159
76	0	6	1	3	J960	J159	I509
83	1	5	0	1		A46
83	1	1	0	2		A46
83	1	1	0	3	A46
84	1	1	1	1		A419	E86	I509
81	1	6	0	1	J960	J13
49	0	5	0	1	A419	E86	J159
49	0	4	0	2	J159	E86
64	0	5	0	1	J108	E86
64	0	1	0	2	J159
40	0	7	0	1	J159
41	0	14	0	2	J159
41	0	7	0	3	J159
41	0	11	0	4	J159
55	0	17	0	1	J960	J159
55	0	10	0	2	A419	J960
55	0	4	0	3	A419
56	0	3	0	4	J159
86	1	4	0	1		J159
25	1	9	0	1	J157	K810
65	1	2	0	1		J159
64	0	27	0	1	K658	K729
42	1	12	0	1		J159
71	0	13	1	1	J158
69	0	6	0	1	J159	J960	I509
62	0	14	0	1	J159
62	0	3	0	2	J159	D696
63	0	10	0	3	J159
62	0	4	0	1	J159	I509
79	0	2	0	1	A419	I509
53	0	2	0	1	J159
60	1	6	0	1	J159
60	1	5	0	2	A403
61	1	2	0	3		J159
61	1	2	0	4		J159
61	1	4	0	5		J159
46	1	7	0	1	J159
82	0	1	0	1	J159
59	1	5	0	1	N10
79	0	8	0	1	A411
79	0	2	0	2	N10
62	1	4	0	1	J09
36	1	4	0	1	J13	J14
38	1	22	0	1	A415
38	1	15	0	2
84	0	4	0	1	J159
85	0	6	0	2	J159
85	0	4	0	3	N10	R650	E86
24	1	5	0	1	K810
65	0	3	0	1	J159
64	0	4	0	1	J159
19	0	37	0	1	J159
19	0	7	0	2	J159
45	1	2	0	1	J159
24	0	1	0	1	A46
66	1	39	1	1	J960	D65	D695	J189	K650	T814
37	0	0	0	1		J159
35	1	2	0	1	A46
62	0	3	0	1	N10	E86
67	1	7	0	1	J159
67	1	2	0	2		J159
67	1	4	0	3	J159
67	1	5	0	4		J159
67	1	6	0	5	J159
58	1	1	0	1	A419	E86
58	1	5	0	2		A410	N178
77	0	5	0	1	J100	J09
69	0	8	0	1		J159
70	1	11	0	1		J159
70	1	3	0	2		J159
70	1	8	1	3	K650
6	1	2	0	1	A46
80	1	3	0	1	N10
69	0	32	1	1		J159	J159
50	0	5	0	1	T814
45	1	5	0	1		J159
63	0	23	0	1	J159
63	0	19	1	2	J960	I509	J159	N179
49	1	3	0	1	J159	E86
33	1	2	0	1		J159
33	1	49	0	2	J960	J159
68	0	9	0	1	A419	R650
68	0	15	0	2	A415
48	0	2	0	1	J159
49	0	3	0	2	J159
59	0	12	1	1	J159
33	1	1	0	1	J159
87	0	1	0	1		I509	J159
79	1	11	0	1	J159	A419	J960
77	0	21	0	1	J159
39	0	4	0	1		J960	J159
58	1	2	0	1	A46
59	1	2	0	2	A46
71	0	11	0	1	J159	J869
71	0	23	0	2	J869	J159	J851
71	0	22	0	3		J159
71	0	16	0	4		J159	J869
56	0	34	0	1		A419
6	0	8	0	1	T814
78	0	6	0	1	N10	E86	N179	R650
78	0	9	0	2	N10
78	0	6	0	3	N10	E86
73	0	15	0	1		J159
73	0	13	1	2	J80	J159
67	1	1	1	1		A419
47	1	28	0	1		K659
65	0	4	0	1	J869
7	0	6	0	2	J159
43	0	5	0	1	J13	A403
43	0	4	0	2	J189	R650
43	0	17	0	3	J189	R650
37	0	2	0	1	J159
33	1	8	0	1	N10
33	1	5	0	2	N10	N10
33	1	3	0	3		N10
69	1	4	0	1		R650
69	1	9	0	2	A415	N10
69	1	3	0	3	A415	N10
54	1	9	0	1	A415	E86
48	0	68	0	1	J960	J159
64	0	5	0	1		R650
41	1	5	0	1	J159	R650
67	0	34	1	1		J159
29	1	11	0	2		T814
29	1	0	0	3	T814
29	1	0	0	5		T814
44	0	1	0	1	J159
81	0	7	0	1	J159
12	0	1	0	1	T814
83	0	8	0	1	T814	E86
66	1	37	0	1	J189	J09	J159
35	0	3	0	1	J101
63	0	12	0	1		K810
63	0	9	0	2	A419
64	0	1	0	3		J159
64	0	4	0	4	A419	J150	J155	R651	J159
64	0	14	0	5		J159
73	0	17	0	1		E86	J159
6	1	21	0	1	A419
42	1	8	0	1	T814
88	0	8	1	1		J159
67	0	4	0	1	J159
53	0	9	0	1	J853
41	0	8	0	1		J159
78	1	8	0	1	A415	D695
78	1	10	0	2		K659
20	1	2	0	1	J157	E86
72	0	9	0	1	N10	R651
57	0	40	1	1	J173	R572	J960
78	0	30	0	1	J869	J159
71	0	8	0	1	J159
29	1	5	0	1	N10
29	1	5	0	2	J159
53	0	5	0	1	J159
43	1	6	0	1	N10	E86
79	0	16	0	1		J158	K720	A46	E86
72	0	8	0	1	A46
73	0	7	0	2	J159	R650
82	0	4	0	1	A419	J189
10	1	0	0	1	A46
61	1	27	1	1		A419
67	0	4	0	1		J09
79	1	11	0	1		A46
79	1	28	1	2		J189	E86	J159	D695	N179
67	0	3	0	1	J159
67	0	4	0	2	J159
39	0	6	0	1		A418
66	0	18	1	5		K819
66	0	16	0	1		J159
55	1	2	0	1	J159
10	1	2	0	1	J158
63	1	3	0	1	K810	I509
63	1	10	0	2	J159	I509
63	1	11	0	3		J159	I509
63	1	4	0	4		J159
61	1	15	0	1		J189	J159	E86
55	0	11	0	1	J159
56	0	5	0	2	J101
56	0	15	0	3	A021
53	1	40	0	1	A415	N178	J952	J159
24	0	7	0	1	N10
68	0	2	0	1	J159
69	0	2	0	2	A419
37	1	2	0	1	A419	J189
66	0	84	1	1	J960	J159
78	1	16	0	1	J158	J960	J159	I509
65	1	4	0	1	J159
63	1	6	0	1	J159
56	1	125	0	2	T814	A419
56	1	5	0	3		T814
64	0	1	0	1	J159
16	0	3	0	1		N10
53	0	19	0	1		A46
69	1	6	0	1	T814
64	0	0	0	1	A46
11	0	5	0	1		J189	J960	J100
11	0	8	0	2	J960	J100
11	0	7	0	3		J100	J189	J960
12	0	15	0	4	J159
23	1	14	0	1		T814
23	1	0	0	2		T814
65	0	4	0	1	J159
91	1	5	0	1	J159
78	1	1	0	1	T814
78	1	8	0	2	T814
70	0	28	0	1		I509	J159
45	1	4	0	1		J159	R572
45	1	8	0	2	J159
45	1	6	0	3	J158
57	0	13	1	1		J159
39	1	1	0	1		J159	D695
40	1	4	0	2	A409	D695	J153	R650
58	0	10	0	1	A419
58	0	20	0	2	A419
58	0	4	0	3	A46
58	0	6	0	4	A46
58	0	27	0	5	A46	A419
80	1	9	1	1	J159
63	1	16	0	1	J960	J159	E86	D696
73	0	4	0	1		A418
74	0	44	0	2	A411	A418	J189
85	0	6	0	2	J960	J159
78	1	4	0	1	J159
78	0	7	0	1	A418
55	0	2	0	1	A46	E86
76	0	5	0	1	N10	I509
47	0	10	0	1	T814
78	0	42	0	1		T814	N178
78	0	14	0	2	T814
78	0	7	0	3		T814
82	1	4	0	1	A403	J158	I509
66	1	8	0	1	J151	J159
66	1	2	0	2	J151
66	1	11	0	3	J151
52	0	7	0	1	K658
52	0	4	0	2	K658
53	0	7	0	3		A410
53	1	9	0	1	J159
53	1	6	0	2	J159
20	0	7	0	1		J159
74	1	21	0	1	J869	J189
74	1	3	0	2		A419
76	0	6	0	1	J159
76	0	8	0	2	J159
76	0	9	0	3	J159	E86
48	1	4	0	1	A46
71	0	52	1	1		J869
19	1	8	0	1	A403
19	1	6	0	2	A419
81	1	25	1	1	A419	N179
81	0	2	0	1	A419	I509	J159
84	0	4	0	1	A46
84	0	13	0	2	A46
72	1	5	0	1	A415
60	0	5	0	1	A419	N179
54	1	0	0	1	T814
6	0	1	0	1	J157
49	0	29	0	1	A419	J189	I509
38	1	6	0	1	A46	R650
39	1	11	0	2		J860
39	1	18	0	3	J869	J159
39	1	2	0	4	J869
39	1	2	0	5	J860
9	1	19	0	1		N10
44	0	9	0	1	K721	K659	A46	K729
44	0	6	0	2	A46	K721
45	0	5	0	3	A419	K721
45	0	12	0	4	K721	K659
21	1	2	0	1	N10
62	1	3	0	1	J159	E86	N179
86	0	4	0	1	J159
86	0	7	0	2		J159
79	1	1	1	1	J960	J159
60	1	7	0	1	A415
62	1	3	0	1	J14
62	1	10	0	2	J14	J960
80	0	18	0	1		J159
80	0	3	0	2	K810
53	0	5	0	1	J159
42	0	18	0	1		R650
42	0	8	0	2	A411	A46
42	0	37	0	3	A410	A419
43	0	26	0	4		T814
66	0	7	0	1	A419	E86	D696	N179
66	1	6	0	1	J159	E86	N179	R651
83	0	9	0	1	A415	N10
86	1	14	0	1	J159	N179
75	1	13	0	1	J159	J960
76	1	16	0	2	A403
73	0	17	0	1		J158
15	1	4	0	1	N10
21	1	3	0	1	J36
40	0	8	0	1	A46
75	0	6	0	1	J159
67	0	8	0	1		A415
81	0	6	0	1		J159
71	0	39	0	1	J960	J159
65	0	23	0	1	A414	J159
66	0	6	0	2		R650
65	0	19	0	1	A410	A419
50	0	39	0	1	J960	N179	J159	I509
31	0	27	0	1		I509	A46
18	1	4	0	1	N10	A419	E86
60	0	23	0	1	A419	A46	I509
9	0	4	0	1	J159
10	0	8	0	2		A46
77	0	12	0	1	A46	I509
25	0	7	0	1	A401	N179
25	0	10	0	2	A401	N179
25	0	3	0	3		A401	N179
25	0	11	0	4		A401
25	0	21	0	5		A401
73	0	4	0	1	J159
58	1	18	0	1		J158	K811	E86
66	1	4	0	1	J13
67	1	7	0	2		K658
67	1	7	0	3		K658
67	1	28	0	4	K650	T814
61	0	2	0	1	N10
84	1	6	0	1	J159
21	1	26	0	1		A419
68	1	4	0	2	A46
62	0	12	1	1	A415
25	1	2	0	1	J101
81	1	5	0	1	J159
40	0	2	0	1	T814
77	0	25	0	1	J13	N179
46	0	24	0	1	K721	J159
46	0	36	0	2	K721	J159
45	0	1	0	1	J159
45	0	1	0	2	J159	D696
65	0	6	0	1	J159
92	0	13	1	1	J159	N179	K729
81	0	14	1	1		A419
76	1	13	0	1	A419
83	0	3	0	1		J159
50	1	6	0	1	A46
55	0	7	0	1		J159
80	0	8	0	1		A415	N179
80	0	6	0	2	A418
80	0	24	0	3	A418	J189
84	0	6	0	1	J159	I509
66	1	4	0	1	K811	I509	J189
18	1	4	0	1	J159
18	1	8	0	2	J159
78	1	2	0	1	I509	J159
79	1	7	0	2	J159	I509
56	0	27	1	1		J159
50	1	8	0	1		J952	J152
28	0	1	0	2	J159
82	1	9	0	1	J14
82	1	40	0	2		J14
84	1	3	0	1	A46
64	1	6	0	1	J159	E86
64	1	4	0	2	J159
64	1	12	0	3	J189	A46
57	1	13	0	1		J159
57	1	29	0	2		I509	J159
77	0	15	0	1	J159	E86
66	1	4	0	1		T814
48	0	18	0	1		J869
35	0	7	0	1	A46
35	0	3	0	2	A46	N179
36	0	17	0	3	A415
87	1	2	1	1	J960	J159
77	0	11	0	1	A46
59	0	4	0	1	J159
80	1	1	0	1	J09	I509
82	1	4	0	1	A415	A46
65	0	0	0	1		J159	A419
65	0	4	0	2	A403	J13
66	0	7	0	3		J151
66	0	8	1	4	J151
80	1	11	0	1		R650
68	1	11	0	1	J14
83	0	12	0	1		J159
60	1	8	0	1		A419
41	0	3	0	1		T814
41	0	70	0	2	T814
64	1	21	0	1		J159
50	1	19	0	1	A419	J960	K720
84	0	15	0	1	J159
83	0	23	0	1	J960	J159	I509
59	0	45	1	1	J960	J869	J159
69	1	6	0	1	J159
50	0	20	0	1		K729	J159
7	0	6	0	1		T814
75	1	4	0	1	A415
30	0	31	0	1	J159	J100	J960
50	1	3	0	1	A46
21	0	3	0	1	J13	J189
83	1	3	0	1		A46
81	1	6	0	1		T814
63	0	5	0	1	J159
56	1	8	0	1		K659
56	1	7	0	2	K659
57	1	2	0	3	J159
57	1	18	0	4	K659
53	0	7	0	1	A46
53	0	9	0	2	A419
88	1	4	0	1	J159	I509
88	1	4	0	2	J159	I509
74	0	5	0	1	J159
88	1	7	0	1	J159
68	1	2	0	1		J159
69	1	6	0	2	K810
70	0	4	0	1	J159
77	0	8	0	1		N10	N179
77	0	7	0	2	J159	E86
77	0	0	1	3	J159
7	0	6	0	1	J960	J159
7	0	1	0	2	J159
57	0	6	0	1	J159
11	0	3	0	1	J108	E86
67	1	17	0	1	A418
67	1	10	1	2	A418
85	0	1	1	1	J159	I509
58	0	8	0	1		I509	K810
57	1	2	0	1	J159
54	0	18	0	1		J159
54	0	28	0	2		A419
55	0	11	0	2		J159	N179
55	0	3	0	3	J159
55	0	0	0	4	J159
12	0	11	0	1		J159	J960
12	0	30	0	2	A415	J960
12	0	13	0	3	A415	J960
13	0	7	0	4	J960	J158
63	1	16	0	1	J159
48	0	9	0	1	J13	A403	R650
50	0	3	0	1	A408	A46
56	1	8	0	1		J159
56	1	9	0	2	J159
56	1	5	0	3	J159
56	1	5	0	4	J159
56	1	9	0	5	J159
83	1	21	0	1		I509	J159
83	1	2	0	2		J159	I509
63	0	14	1	1		A419
81	0	4	0	1	A410	I509
75	0	14	0	1	A410	N179
76	0	5	1	2	A419	I509	J159
77	0	5	0	1	A418	I509
42	1	4	0	2	T814
18	0	1	0	1	T814
18	0	1	0	2	T814	D696
65	1	5	0	1		N10
65	1	13	0	2	A415	N10
80	0	5	0	1	J159
40	0	2	0	1	J869
75	0	3	0	1	J159
51	1	2	0	1		N10
39	1	3	0	1	T814
62	0	56	0	1		A403	J13	B377	J960
61	0	60	0	1		N179	A418
18	0	2	0	1		T814
57	1	6	0	1	J13
80	1	9	0	1	J159	E86
71	1	2	0	1	N10
80	0	6	0	1	J159
87	1	2	0	1	J159	I509
85	0	7	1	1	J158	R651
88	0	3	0	1	J159	E86
77	0	8	0	1	J159	J189
77	0	3	0	2	J159
77	0	3	0	3	J159
77	0	4	0	4	J159
78	0	3	0	5	J159	J101
89	1	15	0	1	J159	I509
78	0	9	0	1		N10	E86	R650
17	1	14	0	1	T814
62	1	3	0	1	J159
73	0	7	0	1	J159
37	0	5	0	1	J13
78	1	7	0	1	J158
61	0	5	0	1	N10	A415
65	0	6	0	1	A415
66	0	4	0	2	A415	E86
66	0	4	0	3	A415	E86
68	0	20	0	1		J159
68	0	14	0	2	J159	D695
69	0	2	0	3	J159
40	1	3	0	1	J159
89	1	4	0	1	J159
8	0	0	0	1	J159
46	0	1	0	1	J159
65	0	25	0	1		A411	D695
7	0	0	0	1	J159
88	0	11	0	1		J159
66	1	24	0	1	A419	A46	D698
67	0	5	0	1	J159
42	0	12	0	1		J159	E86
42	0	6	0	2		J159
65	1	5	0	1	A419
65	1	8	0	2		E86	J159
65	1	2	0	3	J159
21	1	18	0	1		J159
37	1	9	0	1		A419	I509
37	1	1	0	2	T814
94	1	24	1	1		J159
58	1	8	0	1	J159	I509
86	0	9	0	1	N10	E86	I509
44	1	2	0	1		J101
65	0	3	0	1		J159	J189
66	0	46	0	2		J159
81	1	2	0	1	J159	J100
60	0	69	0	1	A415
92	0	4	0	1	J09
79	0	1	1	1	A419
72	0	7	0	1	J159
73	0	13	1	2		A419	J159
78	1	6	0	1	J159
67	0	5	0	1		N10
67	1	3	0	1	J159
46	0	1	0	1	K810
25	0	2	0	1	A400
81	0	6	0	1	J158
69	0	6	0	1	A46
69	0	10	0	1		J159
90	0	20	0	1	J960	I509	J159
90	0	2	1	2	J960	I509	J159
66	1	109	0	1		J158
80	1	7	0	1	J159
62	0	2	0	1		J159
67	1	3	0	1	J14	E86
56	0	21	0	1		J159
56	0	9	0	2	J159
56	0	20	0	3	J152
56	0	28	0	4		J159
56	0	14	0	5	J152
39	1	14	0	1	J159
69	1	7	0	1	A403	E86	J13	N178
69	1	3	0	2	J159
69	1	6	0	3		A419	N178	J159
26	1	18	0	1	T814
64	0	8	0	1		J159
64	0	3	0	2		T814
58	0	17	1	1		A419	I509	J960	N179
32	0	24	0	1	T814
63	0	9	0	1	A410	A46	E86
64	0	13	0	2	J159
64	0	16	0	3		J159
64	0	8	0	4	J960	J159
64	0	4	0	5	J159
61	0	7	0	1		A415
58	0	28	0	1		J159
58	0	7	0	2	J159
58	0	9	0	3	J158
59	0	3	0	4	J159
83	0	4	0	1	J159
75	1	6	0	1		K819
82	1	6	0	1		J159
82	1	4	0	2	J159
27	0	0	0	1	J159
53	0	7	0	1	J159
54	0	5	0	2	J159
51	1	6	0	1	K810
52	1	8	0	2	K811
17	1	3	0	1	J159
87	1	1	1	1	J159	N179
68	1	4	0	1		K650
45	1	9	0	1	T814
75	0	7	0	1	A403	A46	J13
72	1	8	0	1	A415	N10	E86
25	1	2	0	1	N10
85	1	0	1	1	J159
90	1	0	0	1		J159
63	0	13	0	1		J159
64	0	4	0	2	A415
58	0	4	0	1	N10
54	0	1	0	1	J36
89	0	4	0	1		J159
21	1	5	0	1	J157	E86
46	1	4	0	1	N10
43	0	45	0	1		A410
44	0	99	0	2		T814
49	0	5	0	1	J189	A419
76	0	14	0	1	A419
65	0	1	1	1	J159
51	1	4	0	1	J159
51	1	7	0	2	J159
52	1	3	0	3	N10
52	0	4	0	1		A46
40	0	23	0	1		J159	D695
65	0	3	0	1		A418
12	1	3	0	1		J159
12	1	1	0	2	J869
12	1	8	0	3	J869
89	1	3	0	1	J159
78	1	12	1	1	J159
66	0	11	0	1		J159
67	0	3	0	2	J159
67	0	2	0	3	J159	N179
67	0	2	0	4	J159
67	0	7	0	5	J13	I509
65	1	4	1	1	A419	K650
81	0	3	0	1	J159
81	0	9	0	2	J100	J101
81	0	11	0	3	J159
62	1	11	0	1	J159	A419	E86	R651
13	1	0	0	1	N10
76	1	5	0	1	N10	R650
75	1	12	0	1	J869
75	1	21	0	2	J151	J860	T814	J960
75	1	19	0	3	J151	J189	J960
75	1	32	0	4	J159	J960
75	1	24	0	5	J159
43	1	2	0	1	N10
77	0	12	0	1		J159
25	0	4	0	1	J14
71	0	3	0	1	J100	A419	J159	J960
71	0	4	0	2	J158	E86	N178
61	1	6	0	1	A419
6	1	0	0	1	J950	A46
47	1	8	0	1		A409
75	0	5	0	1	J159
75	0	3	0	2	J159
35	1	3	0	1	A46
39	1	20	0	1		J159
70	0	32	0	1		J159
70	0	9	0	2	T814
72	0	12	0	1	K810	J159	T814
62	0	1	0	1	J159
28	0	3	0	1	J159
29	0	5	0	2	A413
29	0	7	0	3	A419	J189
77	1	8	0	1	J158
78	1	8	0	2		J159	I509
63	1	34	0	1		J156	J960
82	0	5	0	1	J159	E86
58	0	18	0	1	J159	J869
58	0	7	0	2	J151	N990
67	0	10	0	1		A46
67	0	8	0	2	A410
68	0	18	1	3		J159
79	1	11	0	1	K819	E86
45	0	4	0	1	J189	R650
49	1	3	0	1		J159
30	0	1	0	1		R650
7	1	13	0	1		A411
88	1	5	0	1		E86	J101
63	0	14	0	1	J158
77	0	7	0	1	J159	I509
51	1	7	0	1	A418	D695
58	0	11	0	1		A46
68	1	7	0	1	I509	J159
65	1	6	0	1	A419	E86
74	0	13	0	1	A410
45	0	4	0	1	J159
81	0	11	0	1	J159	I509	N179
82	0	40	1	2		J960	I509	J159
79	0	33	0	1		I509	E86	J159
76	1	5	0	1	J159	E86
75	0	3	0	1	A419	N10
46	1	3	0	1	J159
64	0	5	0	1	A46
64	0	11	1	2	A415	N179	K729	E86
45	0	13	0	1	J851	N179
44	0	2	0	1	N179	A46
44	0	10	0	2		A46
45	0	6	0	4	A46	N179
26	1	6	0	1		N10
85	0	15	0	1		N170	J952	A415
75	1	4	0	1	J159	E86
83	1	6	0	1		A419
7	1	2	0	1		T814
92	0	11	1	1	A419	J189	J952	J159
82	0	21	0	1	J159
83	0	5	0	2	J159
85	0	9	0	1		J159	I509
74	0	5	0	1	J159
74	0	4	0	2	J159
65	1	2	0	1	A46
87	1	4	0	1	A413
87	1	3	1	2	J159	J960
77	0	7	0	1		J159
89	0	3	0	1	A46	E86
90	0	1	0	2	K819
71	1	7	0	1	J159
67	1	4	0	1	J13
62	0	5	0	1	A403
78	0	3	0	1	A46
69	1	15	0	1		J159
71	0	3	0	1	K659
71	0	2	1	2	K659
86	0	15	0	1		N10
33	0	4	0	1		T814
33	0	2	0	2		T814
33	0	56	0	3		T814
33	0	13	0	4	T814
53	0	9	0	1	J158	E86	J159
67	0	18	0	1	J159	J960	R651
67	0	3	0	2	A415	E86
67	0	4	0	3		E86	J159
85	0	5	0	1	J159	E86	N179	R651
61	1	4	0	1	J159	E86
70	0	31	0	1		I509	N990	N10
77	1	4	0	1	A419
77	1	2	0	2	A419	N10	E86
51	0	3	0	1		R650	J960	J159
57	1	3	0	1	J159
57	1	6	0	2		E86	J14
57	1	6	0	3	A415	J156	E86
66	0	9	0	1	A46
60	0	2	0	1		J159
64	0	14	0	1		J159
82	0	2	1	1	A403
59	0	8	0	1	J159
55	1	10	0	1	J159
56	1	11	0	2	J159
73	0	20	0	1		J159
60	1	5	0	1	J159	J159
52	1	4	0	1	J13
65	1	5	0	1		A46
75	1	3	0	1	J159
19	0	2	0	1	A46
38	1	3	0	1	A46
6	0	3	0	1	J159
83	0	4	0	1	J158
32	1	0	0	1		J159
67	0	21	0	1	A418
56	0	5	0	1	K810
80	0	4	0	1	J159
67	0	4	0	1	J13	R650
68	0	6	0	2	J960	J159
68	0	2	0	3	J159
44	0	7	0	1	A410
44	0	4	0	2	J159	E86
72	0	3	0	1	J960	I509	J159
61	0	23	0	1		J159
61	0	11	0	2	J159
62	0	9	0	3	J158
62	0	15	0	4	J151
59	0	4	0	1	T814
67	1	10	0	1	A419
55	0	11	0	1		A419
55	0	28	0	2		A419	D695	E86
55	0	9	0	3	A415	D695
56	0	16	0	4		A415	D695
56	0	34	0	5		A419
6	0	14	0	1	J391
53	1	62	0	1	A418	D696
53	1	35	1	2	J960	A411	N179
76	1	3	0	1		J159
70	0	12	0	1		A419	J159
11	1	19	0	1		J159
67	0	3	0	1	J159
68	0	3	0	2	J159
20	0	3	0	1		J159
21	0	5	0	2	J159
74	0	3	0	1	J158
7	1	7	0	1	A419
7	0	3	0	1		A46
79	1	10	0	1	J159	R650	E86
70	0	9	0	1		J159
86	1	8	0	1	A46
76	0	11	0	1	J159
86	1	5	0	1	N10	E86
86	1	14	0	2		J159
87	1	8	0	3	J159
87	1	5	0	4	J159	J159
48	0	4	0	1	A401
81	0	9	0	1	A46
39	1	4	0	1		T814
21	1	20	0	1		T814
27	0	8	0	1	J09	J159
35	1	9	0	1	J154
38	1	6	0	1	T814
27	0	10	0	1	J159
67	1	2	0	1	K811
28	1	4	0	1	A403
63	0	1	0	1	J159
63	0	5	0	2	J159
63	0	5	0	4		J159
40	0	2	0	1	A46
64	0	6	0	1	A418	J188
82	1	16	0	1	J960	J159
72	0	1	0	1		J860
72	0	1	0	2		J860
72	0	1	0	3		N990	J860
68	1	9	0	1		J159
68	1	10	0	2	J158
75	0	10	0	1		A419	I509
75	0	12	0	2	A415	N10
75	0	5	0	3	A415	N10
75	0	12	0	4		N10
75	0	18	0	5		N10
44	0	4	0	1		K659
79	0	6	1	1	J960	A419	E86
44	1	73	0	1		N179	K650	A419
44	1	31	0	2	A415
65	0	21	0	1		J952	J159	N990	N179	T814
86	0	3	0	1		J100
29	1	7	0	1		T814
68	0	6	0	1	J157	I509
74	0	11	0	1	J159	E86
74	0	41	0	2		J159
88	0	19	0	1		R650	E86	I509
73	1	3	0	1	J159
73	1	4	0	2	J159
74	1	5	0	3	J159
75	0	19	1	1	J960	J159
73	0	8	0	1	N10	N179
76	0	2	0	1		J159
87	1	4	0	1	J159	J960
88	1	6	0	2		J159
88	1	4	1	3	A419	E86	K810	R651
66	1	11	0	1		J159
66	1	13	0	2		J159
67	1	15	0	3	J851
67	1	6	0	4	J851
43	1	2	0	1	N10
86	0	6	1	1		J159
85	0	17	1	1	A415	J960	A419
75	1	7	0	1		T814
67	0	10	0	1		J158
67	0	3	0	2		J158
90	0	17	1	1	J159
56	1	10	0	1	J159
56	1	11	0	2	J159	E86
56	1	3	0	3	J159
56	1	4	0	4	J159
53	1	4	0	1	A46
53	1	11	0	2		A415
95	1	2	0	1		J159
29	1	4	0	1	J13	R650
29	1	4	0	3	J13
29	1	5	0	4	A419	J14
73	0	8	0	1	J159
73	0	5	0	2	J159
73	0	13	0	3	J860
73	0	18	0	4	J869	J159
47	0	2	0	1	A46	E86
29	0	3	0	1	A46	A401
15	0	2	0	1	J159
13	0	2	0	1	J159
72	0	78	1	1	A419
81	1	1	0	1	T814
82	1	6	1	2		J159
66	0	8	0	1	A410
67	0	9	0	2	J09
67	0	4	0	1	N10
65	0	13	0	1	J869
66	0	53	1	2		T814
48	0	8	0	1	J159
51	1	7	0	1	J13	R572
61	1	22	0	1	J09
75	0	3	0	1	J159
82	1	6	0	1	J159
25	1	8	0	1	T814
64	0	5	0	1	J159	R650
64	0	22	0	2		A415	D695
45	1	3	0	1	T814
78	1	5	1	1	J159
74	1	18	0	1		T814
27	1	5	0	1	A415
56	1	20	0	1	J159	J960	N990
70	0	46	0	1		J159
59	1	13	0	1		T814
59	1	3	0	3		T814
82	0	6	0	1	A46
82	0	14	0	2	J159	A46
82	0	7	0	3	J159
36	1	4	0	1	A415
5	0	10	0	1		E86	J101
64	0	22	1	1	I509	J159	N179
39	1	4	0	1	J159
87	1	8	0	1		J108
87	1	5	0	2	I509	J159
56	0	7	0	1	J159
62	0	0	0	1	T814
63	0	6	0	2	J159
35	0	2	0	1		R650
58	0	24	0	1		A415
58	0	7	0	2	J159
58	0	3	0	3	J159
84	0	5	0	1		T814
85	0	6	0	1	J159	I509
85	0	11	0	2	I509	J159
77	1	13	0	1	A415
57	0	4	0	1	A419
44	1	11	0	1		J159
85	0	11	0	1	K810
85	0	15	0	2		K810
85	0	9	0	3		K810
86	0	10	0	4	K810
86	0	9	0	5		K810
86	1	11	0	1	J158
86	1	6	0	2		J159
15	0	1	0	1	A46
85	0	8	0	1		J159
86	0	8	0	1	J159	E86	I509
86	0	5	0	2	J159	I509
40	1	12	0	1	T814
40	1	14	0	2	T814
88	0	6	1	1	A415	I509	N179
71	1	2	0	1	T814
61	0	9	0	1	J159
68	0	10	0	1	A419	J189	N179
28	0	6	0	1	J159
72	1	2	0	1		J159
80	1	25	0	2		A46
80	1	8	0	3		A46
66	0	9	0	1	A419	D695
66	0	2	0	2		A415	D695
66	0	28	0	3		A419	D695
49	0	4	0	1		A415	T814
49	0	46	0	2		T814	T814
83	0	17	0	1		J159
80	1	5	0	1		J159
18	0	10	0	1	A419	E86	J159
18	0	9	0	2	A419	J159
19	0	4	0	3	J189	R651
19	0	7	0	4	J189	E86	R650
75	0	16	0	1	J960	J159
87	0	1	0	1	J159
6	0	3	0	1	J101	E86
6	0	1	0	2	J101	E86
84	1	7	0	1	A46
84	1	1	0	2	A46	I509
47	0	18	0	1	T814
76	0	18	0	1
76	0	4	0	2	K659
77	0	16	1	3	J159
60	0	4	0	1	J159
45	0	2	0	1	J159
46	0	41	0	2	J159
46	0	37	0	3		J159
46	0	3	0	4	J159
47	0	3	0	1	J09
91	1	12	0	1	J159	I509
70	0	51	0	1		J960	J158
86	0	16	1	1	A418	J851
39	1	3	0	1		K819
81	1	18	0	1		J159
82	1	2	1	2	J159	I509
72	0	12	0	1		J159	N179
93	0	4	0	2	J159	I509
75	0	10	0	1	T814
75	0	29	0	2	T814
72	0	48	0	1		J159
87	0	8	0	1	A410
56	0	4	0	1	J159
67	0	6	0	1	J101
67	0	27	0	2	J960	J159	J189
39	0	4	0	1	A46
13	0	8	0	1		N10
13	0	12	0	2	T814
77	1	6	0	1	A415
77	1	6	0	1	A415
63	0	13	0	1	A46	E86
89	0	4	0	1	J159
61	1	6	0	1	J159
80	0	4	0	1	A415	E86	I509	N10	N179
68	1	3	0	1	J14	J960
82	0	2	0	1	A415	I509
83	0	1	1	2	A419
79	1	1	1	1	A415
61	0	5	0	1		J159
60	0	3	0	1		J159
10	1	2	0	1	J151
10	1	3	0	2	J151
10	1	14	0	3	J151
11	1	3	0	4	J151
11	1	0	0	5	J151
51	1	13	0	1		T814
86	1	3	0	1	J13
66	1	33	0	1		T814
80	1	3	0	1		E86	I509	J159
61	0	8	0	1	J159
62	0	4	0	2	J159
62	0	3	0	3	J159
11	0	2	0	1		E86	J09
62	0	8	0	1	T814
38	1	5	0	1	J159
38	1	7	0	2	J159
38	1	2	1	3		J159
79	0	3	0	1	A419	E86	N179
40	1	13	0	1	J869	J13	R651	A403
69	0	2	0	1	J158
74	0	0	0	1	J159
74	0	3	0	2	J159
65	0	20	0	1		T814
34	1	3	0	1	J159
60	1	14	0	1	A415
60	1	16	0	2	A415
60	1	20	0	3	A415
90	1	3	0	1		J158
55	0	8	0	1		J852
55	0	3	0	2	A410	J851
55	0	23	0	3		J852
82	1	2	0	1	J159
83	1	5	0	2		J159
68	1	4	0	1	T814
54	0	7	0	2	J14
85	0	8	0	1	N10	I509
31	1	2	0	1	J13	R650
58	0	6	0	1		R651	A419
51	1	6	0	1	A46
78	0	3	0	1	J159	R650
45	1	14	0	1		T814
73	1	8	0	1	A46	I509
88	1	0	0	1	J960	J159
91	0	9	0	1	I509	J159
85	1	23	0	1	J159	N179
83	0	5	1	1	J159	J960	E86
81	0	23	0	1	J159	E86	J189
11	1	8	0	1	A419
11	1	4	0	2	A419
11	1	12	0	3	A419
80	0	6	0	1		N10
76	0	2	0	1		J159
77	0	4	0	2	J159
5	0	12	0	1	A419
6	0	11	0	2		A419
79	1	8	0	1	J14
50	1	10	0	1	J159
50	1	63	0	2		J860
50	1	8	0	3	J159
51	1	7	0	4	J152
62	0	19	0	1		A419
62	0	7	0	2	J159
62	0	4	0	3	J159
62	0	12	0	4	J159
7	0	8	0	1	J152
68	0	2	0	1	I509	J157	J159
68	0	4	0	2		R650	E86	N178
68	0	6	0	3	J189	E86	N10
67	0	6	0	1	J159
87	1	3	0	1	J159
64	0	10	0	1		K659	K650
81	0	0	0	1	J159
82	0	38	0	2		J159
82	0	11	0	3	J159
82	0	14	0	4		J159
52	1	5	0	1		J159
81	0	4	0	1	A418	E86	I509
62	0	1	0	1	J159
82	1	5	0	1	A418
66	0	1	0	1	J159
66	0	3	0	2	J158
71	1	5	0	1	A418
58	1	104	0	1		A419	T814
58	1	20	0	2		T814
92	0	30	0	1		A410	I509	E86
28	1	7	0	1		T814
81	1	13	0	1		A415	I509
28	1	7	0	1		J159
66	1	9	0	1	T814
56	0	2	0	1	J159
19	0	17	0	1		T814
19	0	8	0	2	T814
6	1	3	0	1	N10	E86
7	1	2	0	2		J399
61	0	14	0	1	A46
81	0	5	0	1	J159	I509
74	0	3	0	1		N10
75	0	12	0	2		J159
56	0	1	0	1		R650	A419	R659
82	0	6	0	1		J159
82	0	6	0	1		A46
56	1	28	0	1	J158
57	1	9	0	2		J159
53	0	1	1	1		J159
68	0	7	0	1	A46
50	0	3	0	1		A419	E86
58	0	1	0	1		T814
30	1	8	0	1			o85
5	0	3	0	1	J100	J189
81	0	8	0	1	J159
20	1	2	0	1	N10
52	0	6	0	1	A46
94	0	4	1	1	A419	J159	I509
59	0	4	0	1	J158
59	0	5	0	2	T814
82	1	22	0	1	A414	E86	I509
70	0	6	0	1	J13
71	0	12	0	2	J151	R650
39	0	11	0	1	A418
68	1	20	0	1	J159	E86
81	0	10	0	2	T814
43	1	3	0	1	J158	J159
55	0	6	0	1	A46	I509
68	1	9	0	1		A419
57	0	4	0	1	J159
57	0	14	0	2	A411	N10
79	1	6	0	1	J13
7	0	3	0	1		J158
59	1	7	0	1	J158
68	0	9	0	1	J159
68	0	14	1	2	J159	N178
11	0	1	0	1	J159
64	1	2	0	1	T814
89	0	4	0	1	J159	E86
79	1	5	0	1		I509	N10
58	1	3	0	1	J159
80	0	2	0	1	K810
69	1	7	0	1	A46
69	1	5	0	2	A46
88	0	10	0	1		J159
48	0	5	0	1	J960	J189	J159
50	1	7	0	1		J159
63	0	13	0	1	K659
63	0	0	0	2		T814
64	0	2	1	5	A419
26	0	13	0	1		J159
26	0	22	0	2		A46
27	0	10	0	3	J159
71	0	8	0	1	A415	R572	N179
85	0	8	1	1		A46
72	0	5	0	1	J159
83	1	5	0	1	J159	E86
36	0	6	0	1	A410	J152
63	0	11	0	1	J14
7	0	5	0	2	T814
54	0	3	0	1	J159
65	0	13	0	1		I509	J159
81	0	5	0	1	J159
81	0	2	0	2	J159	N179
38	0	10	0	1	A46
43	0	3	0	1		N10
66	0	11	0	1	J159
65	0	3	0	1	J159
85	1	6	0	1	J100	I509
85	1	11	0	2	A419	I509	J159
55	0	5	0	1		J159
59	0	14	0	1	J851	J159
75	0	15	0	1	A410
27	1	5	0	1		J159
61	1	7	0	1	J13
62	0	4	0	1	A46
78	0	13	0	1		T814
64	0	5	0	1	A415	E86
76	0	14	1	1	N10
80	0	6	0	1	A415
70	0	9	0	1	J159	I509
70	0	3	0	2	J158	I509
71	0	3	0	3	J159	I509
71	0	8	0	4	J14
94	1	4	0	1	J159
79	0	5	0	1	J189	J159
45	0	6	0	1	N10
45	0	6	0	2	N10	R659
79	0	12	0	1	J159
91	0	49	0	1		A410
91	0	22	0	2		A410	E86
74	0	6	0	1	J960	A419	J159
74	0	14	0	2		A419	J159	J960
53	1	1	0	1	J159
54	1	6	0	2		J159
54	1	16	1	3		J159
81	1	3	0	1	J159
80	0	8	0	1		J159
12	1	0	0	1	J159
79	1	11	1	1	A400	A415	J159
57	0	5	0	1	J159	I509
23	1	7	0	1	J09	J152
85	1	5	0	1	J159	E86
85	1	4	0	2	J159	E86
85	1	10	0	3	J158	E86
96	1	8	0	1	N10
26	1	1	0	1	A403
50	1	3	0	1	N10
59	1	5	0	1	J159	I509
58	0	23	0	1		A419
57	1	2	0	1	N10
88	0	14	0	1		J159	I509
82	1	12	0	2	J159
67	0	16	0	1	J159	I509
86	0	16	0	1		J159
64	1	0	0	1		N10
84	1	4	0	1	A419	J159
85	1	5	0	2	J159
85	1	5	0	3	J159
30	0	8	0	1		N10
60	0	10	0	1		K659	N179
78	0	2	0	1	T814
89	1	7	0	1	J159
38	1	2	0	1		E86	N10
62	0	3	0	1	A46	E86
50	0	3	0	2	A46
51	0	2	0	3	A46
51	0	3	0	4	A46
51	0	2	0	5	A46
54	1	5	0	1		N179	R650
55	1	5	0	2	A418	E86
55	1	21	0	3	A419	N179
56	0	3	0	1	J158
56	0	13	0	2	A411
56	0	41	0	3	A411
88	1	2	0	1	N10
21	1	2	0	2	J159
42	1	7	0	1		J159
42	1	3	0	2		J159
85	0	6	1	1	J960	A419	J159	N179
75	1	1	0	1	A46	I509
65	0	4	0	1		A419
65	0	13	0	2		A418
90	0	13	0	1	A415	N179
90	0	5	0	2	N10	N179
63	1	7	0	1	A403	J13
63	1	6	0	2	J159
80	0	8	0	1	J13	R650	E86
5	1	1	0	1	J392
6	1	3	0	3		J392
61	0	7	0	1	J159
62	0	6	0	2	J159	J960
58	1	2	0	1	A46
36	1	13	0	1		T814
73	0	22	0	1	A410
82	0	11	0	1	J159	I509
78	0	1	0	1	J159
58	0	7	0	1	J159	J960
81	1	5	0	1	A419
39	0	60	0	1		A419
39	0	32	0	2		A415
39	0	31	0	3	A415	A411	I509	R572	A412
40	0	1	0	4	J09
85	1	7	0	1	J159	I509
72	0	10	1	1	N179	J159
8	0	5	0	1	E86	J09
78	0	10	0	1	A418	N179	E86
48	0	2	0	1	J159
40	1	3	0	1	T814
40	1	5	0	2	T814
40	1	18	0	3	T814
55	0	3	0	1	A419	A46
38	1	4	0	1	T814
12	0	3	0	1	N10
13	0	5	0	3	J159
54	1	3	0	1	K810	E86
42	0	3	0	1	A46
72	1	4	0	1	J159
83	1	3	0	1	J09	E86
51	0	4	0	1	N10	R650	N179	E86
78	0	27	0	1		J189	N179	K819	N178
58	1	3	0	1	J159
50	1	3	0	1	T814
55	1	5	0	1		A419
55	1	11	1	2		A418	R651
19	1	7	0	1	T814
19	1	0	0	2	T814
62	0	28	0	1	K650	J159
75	1	3	0	1	J159
64	1	4	0	1	J14
59	1	6	0	1	J159
36	1	3	0	1
84	1	11	1	1	A410
74	1	3	0	1	N10
49	0	4	0	1	J159	I509
57	0	28	0	1		K650	T814
82	0	20	0	1	J159	A419	E86
77	0	5	0	1	A415
68	1	3	0	1	T814	I509
65	0	0	0	1	J159
87	1	6	0	1	J159	I509	J189	R650
65	0	6	0	1	T814
76	1	25	0	1	A410	I509
76	1	5	0	2	A410	I509
79	0	9	0	1	I509	J159
37	1	2	0	1	J157
37	1	4	0	2	J157
67	0	8	0	1	A415
49	1	5	0	1	J159
78	0	11	1	1		A415	J960
87	1	16	1	1		A419
57	0	3	0	1	T814
26	1	0	0	1	N10
54	1	4	0	1		J399
64	1	3	0	1	N10
78	1	13	0	1		A418
74	0	16	0	1		A419
70	1	16	0	1		I509	J159
70	0	10	0	1	J159
78	1	13	0	1	J159
78	1	11	0	2	J159
89	1	7	0	1		J189	A46
57	1	12	0	1	T814
86	1	13	0	1	A46	I509	N179
88	1	4	0	1		J159
64	0	1	1	1	A403
85	1	6	0	1	A46	E86
44	1	3	0	1	J159
69	1	11	0	1		J159
87	1	6	0	1	A415	E86
58	1	12	0	1	A415
58	1	2	0	2		J150
58	1	2	0	3	A415
67	1	6	0	1	A46	E86
62	0	4	0	1	J159
87	1	8	0	1	J13	E86
82	0	11	0	1	J159
89	0	3	0	1	J159
76	0	5	0	1	J155
28	0	3	0	1	N10
49	1	11	0	1	J960	J159
92	0	4	0	1	J159
92	0	7	1	2	J159
56	1	4	0	1	J159
72	0	2	0	1	J159	E86
79	0	4	0	1		A46
62	0	1	0	1	J159
77	0	2	0	1	J159
58	1	3	0	1	J159
58	1	4	0	2	A409
58	1	21	0	3		A418
58	1	0	0	4		A418
61	0	9	0	1	J159
61	0	2	0	2	J159
61	0	5	0	3		J159
62	0	9	0	4	J14	N179
62	0	5	0	5		J159
22	1	2	0	2	A46
64	1	3	0	1	K810
23	0	7	0	1	J159
91	1	18	1	1	K810	I509
60	1	20	0	1	J151
29	1	9	0	1		J100
56	1	1	0	4	T814
58	0	7	0	1	A415
59	0	6	0	2	A415
32	1	8	0	1		J159
81	0	15	0	1		J159	J960
81	0	11	1	1		A419	N170
74	0	3	0	1	J159
62	0	30	0	1		A419	E86
69	1	2	0	1	J159
28	1	8	0	1	A419
71	0	3	0	1	J159
50	1	56	0	1	A403
65	1	14	0	1	A46
65	1	6	1	2	A415	J159
75	0	11	0	1	J159	E86
65	0	2	0	1	J159
56	0	10	0	1	J159
56	0	7	0	2	A46
77	0	6	0	1	N10	N179
60	0	27	0	1	A419
60	0	9	0	2		A419
61	0	30	0	3	A419	J09	J159
29	0	6	0	1	A419
15	0	8	0	1	A419	D695
15	0	10	0	2	A419	D695
15	0	6	0	3		A419	A411
24	1	1	0	1		J101
47	0	9	0	1		J159
75	1	4	0	1	J159
68	0	16	0	1		T814
74	0	65	1	1		J159
18	1	20	0	1	J960	J159	E872
64	1	15	0	1	A410	J960	J159	A46
69	1	1	1	1	A419	D65	N179	K720	E872
91	1	21	0	1		J159
80	0	15	0	1		A410
20	0	4	0	1	T814
64	1	3	0	1	A46
75	1	6	0	1	J159
97	0	11	0	1	A46
62	0	2	0	1	K810
29	1	1	0	1		J36
63	1	22	1	1	K650	N178
47	0	53	0	1		K650	K659
27	1	7	0	1	J159
27	1	7	0	2	J159
28	1	5	0	3	J13
24	1	5	0	1	J159	J159
79	1	10	0	1		J159
75	0	10	0	1		I509	J159
72	0	7	0	1		T814
63	1	5	0	1	A46
63	1	10	0	2		J159	E86
64	1	5	0	3		J159
64	1	0	0	4		J159
64	1	0	0	5		J159
34	1	7	0	1	J159	E86	E86	J159
83	0	5	0	1	A415
36	1	8	0	1	A411
77	0	3	0	1	J159	I509
5	0	1	0	1	J159
5	0	1	1	2	A419
83	1	2	0	1	J159
64	0	4	0	1	N10
67	0	6	0	2	A415
68	0	1	0	3		N10
57	0	2	1	1	A403	K721
56	1	4	0	1	J09	E86
37	1	3	0	1	J159
38	1	6	0	2	J159
79	0	4	0	1	J159
37	0	8	0	1	T814
70	0	1	0	1	A419	R572
70	0	4	0	2		A400
92	1	5	0	1	A415	N10
73	1	11	0	1	J159	I509
83	1	10	0	1		J159	A419
68	0	1	0	1		N10
7	1	9	0	1		T814
61	1	14	0	1	A411	A410
66	0	13	0	1	J869
66	0	2	0	2	J869
66	0	14	0	3	J869
66	0	0	0	4	J189	J869	J159
77	1	4	0	1	J159
73	1	5	0	1	A401
75	1	7	0	1	J159
7	1	9	0	1	A419	D696
7	1	1	1	2	J159
78	0	7	0	1	A410	N179	E86
65	0	3	0	1	J159	J100
51	0	6	0	1	J159
72	0	10	0	1		J159
72	0	15	0	2		J159
73	0	11	0	3		A419	D695	E86	J159
73	0	5	0	4		A419	D695	E86	J159
73	0	5	0	1	A400	J13
73	0	2	0	2		A46	I509
73	0	5	0	3	A46
73	0	3	0	4	A419	A46
73	0	3	0	5	A46
52	1	14	0	1		J159
76	1	3	0	1	J159
43	1	8	0	1	A46
80	1	19	1	1	J159
59	0	11	0	1		J159
59	0	7	0	2	I509	J159
56	0	8	0	1		A46
57	0	5	0	2	A46
37	0	2	0	1	J159
95	0	5	0	1	A415	I509
40	1	4	0	1	A46
92	1	3	0	1	N10	E86	N172
56	1	2	0	1	J13	E86
56	1	2	0	2	J13
8	0	28	0	1		J159
68	0	6	0	2	J159	N178
84	0	6	0	1		J159
85	0	22	1	2	K819	J159
58	0	8	0	1	J159
50	0	2	0	1	J36	E86
60	0	3	0	1	J159
59	1	4	0	1	J159
44	1	6	0	1	A415	N10	N179	A419
98	1	1	0	1	J159
67	0	5	0	1	J159
67	0	7	0	2	J159	N179
67	0	4	0	3		J159
67	0	10	0	4		A409	J189
27	0	16	0	1	J159	A419	R572	J960	N179
27	0	10	0	2	J151
27	0	0	0	1	J09
72	0	4	0	1	J159
72	0	7	0	2	J189	I509	J159
65	0	3	0	1	A419	N10
81	1	5	0	1	J159
80	1	6	1	1	J159
80	1	8	0	1		R650
64	1	25	0	1		T814
31	1	4	0	1		O85
59	0	5	0	1	N10	E86
28	0	4	0	1	A46	R650
52	1	17	1	1		J159
90	0	13	1	1	J159	I509
5	0	0	0	1	J159
79	0	13	0	1	T814
82	1	1	0	1	J159	E86
67	1	7	0	1	J159	E86
67	1	19	0	2	J159	E86
45	1	4	0	1	J159
45	1	5	0	2	J159
44	1	4	0	1		R650
41	0	3	0	1	A418	R651	E86
43	1	2	0	1	A46
52	1	4	0	1		J158
81	0	14	0	1		J159	I509
81	0	8	0	2	J159
82	0	4	1	3	J159	E86	J960
11	1	6	0	1		J13
88	1	12	0	1	J159
74	1	1	0	1	T814
80	0	34	0	1		A415	J960	N178
51	0	32	0	1		A419
58	1	8	0	1		J159
44	0	5	0	1	J159
73	0	10	0	1	A411	N178	N179
74	0	12	0	2	E86	A419	N178
74	0	8	0	3	A419	N179	E86
64	1	23	0	1	K650	J189
82	0	7	0	1	A419	N10	E86	J960
82	0	42	1	2	J151
88	1	14	0	1	J159
89	1	1	0	2	J960	J159	N179
72	0	10	0	1	J159	E86
5	0	6	0	1	J159
76	1	9	0	1	A403
64	1	23	0	1		K650
50	1	26	0	2	T814
50	1	0	0	3	T814
50	1	10	0	4	T814
64	1	7	1	1	N10	R650
54	0	5	0	1		J159
54	1	8	0	1	A415	E86
55	1	5	0	2	N10	E86
19	1	11	0	1		T814
8	1	6	0	1	A46	E86
71	0	5	0	1	A415	N10	E86
71	0	9	0	2	A415	N10	E86
72	0	15	0	1		T814
83	0	9	0	1	J13	I509	N179
84	0	7	0	2	A419	R659	K810	I509
62	1	17	0	1	T814
80	0	7	0	1	A418	N10	J960	E86	R651
80	0	11	0	2	N10	E86
80	0	5	0	3		J159
43	0	8	0	1	K810
32	1	3	0	1	J159	R650
32	1	3	0	2	J159
80	0	1	0	1	J159
77	0	3	0	1	A419
77	0	1	0	2	A409
77	0	7	0	3	A419
54	1	7	0	1		J159
36	1	11	0	1	N10
61	0	5	0	1	A419	I509
61	0	6	0	3	A46	I509
61	0	4	0	4	N10	I509
40	1	3	0	1	J159
39	1	1	0	1		J159
15	0	5	0	1		J159
15	0	4	0	2	J159
15	0	22	0	3		J159
16	0	5	0	4		J159
16	0	1	0	5	J159
77	1	20	0	1		A419
73	0	0	1	1	A419	J189
31	1	8	0	1	K810
32	1	1	0	2	J960	A419	D696	E86
32	1	7	0	3		A411	A419	D696
32	1	5	0	4		A419
50	0	2	0	1	J13
35	1	1	0	3	J36
62	1	6	0	1		A46
63	1	53	1	2		R651	T814
70	1	63	0	1	M726	J13	A403	A419
50	0	3	0	1	J13
23	0	0	0	1	T814
77	0	6	0	1	A403	J13	A418	R650
64	1	0	0	1		J158
65	0	9	0	1		T814
66	0	9	0	2		J159
49	0	7	0	1	J189	R650
77	0	3	0	1	J159	E86
78	1	4	0	1	J159	N10	E86
45	1	2	0	1	A46
60	0	38	0	1		J860
92	0	8	0	1	A418	N178
34	0	32	0	1	T814	K650
72	1	4	0	1	A419	J159	J960	E86
84	0	5	0	1		N10	E86
81	0	6	0	1		N178	R650	A418
55	0	3	0	1	A46
74	0	4	0	1	A415
81	0	7	0	1	A418
64	1	16	0	1		J159
64	1	10	0	1	J151
65	1	9	0	2	J151
65	1	17	0	3	J157	J960
61	0	17	0	1	T814
70	1	20	0	1	A410
71	1	18	0	2	A410	I509	J960	N179	A411
71	1	41	0	3	A410
60	0	4	0	1		J101
53	0	92	1	1		J955	J960	J155
82	0	8	0	1	A46
89	0	5	0	1	J159
94	1	4	0	1	J13	E86
59	0	5	0	1		N10
59	0	5	1	2		R650	J159	N179
88	1	5	1	1	J960	N179	J159
79	1	6	0	1	J159	I509
79	1	4	0	2	J159	E86	N179
62	0	3	1	1	A410
83	1	9	0	1	A418	N179
19	1	1	0	1	N10
57	1	4	0	1	J159
57	0	1	0	1	T814
57	0	88	0	2	T814
45	1	3	0	1		J159
45	1	28	1	2	A419	D696	J960	N179
32	1	3	0	1	J159
27	0	4	0	1	J101	E86
74	0	9	0	1	N10	E86
38	1	3	0	1	N10	E86
49	1	7	0	1	J159
49	1	5	0	2	J159
39	1	3	0	1	J159
41	1	5	0	1	J159
70	1	4	0	1		T814
70	1	7	0	1	J159
81	0	10	0	1	J189	J960	A419
63	0	27	0	1		D696	A419
63	0	10	0	2		A419	D695	E86
90	0	18	0	1	A415	N10	E86
52	0	5	0	1	J159	E86
52	0	2	0	2	J159
52	0	5	0	3	J159	E86
5	0	0	0	2	J159
56	1	43	0	1		T814
55	0	1	0	1		R650
55	0	2	0	2		R650
51	0	6	0	1	J189	A419
27	1	32	0	1		T814
47	1	4	0	1		J159
18	1	5	0	1	N10
18	1	1	0	2		N10
18	1	3	0	2	N10
86	1	5	1	1	J159	I509
59	0	5	0	1		J159	J189
67	0	29	0	1	J159
67	0	4	0	2	J159
68	0	6	0	3	J159
68	0	8	0	4		J159
68	0	8	0	5	J159	J960
82	0	5	0	1	J159
82	0	4	0	2	J159
66	1	4	0	1	A415	N10
54	0	57	0	1	M726
63	1	3	0	1	A46
90	0	6	0	1	A46
37	0	7	0	1	A400	J154
77	0	18	0	1		A403
74	0	9	0	1	J159
75	0	8	0	2	A418
85	0	11	0	1	A419	A46	J159
85	0	3	1	2		A419
61	0	6	0	1	J159
61	0	9	0	2	J159
8	0	2	0	1	A46
66	0	5	0	1	T814
88	1	29	0	1		A410	I509	N179
89	1	3	0	2	J159
61	0	7	1	1	J159
81	0	8	0	1	A415
81	0	6	1	2	A415
87	0	11	0	1	A419	N10	N179	I509
5	0	0	0	1		J392
69	1	17	0	1		J159
76	0	4	0	1	J159
76	0	5	0	2	J159
74	0	6	1	1	J960	J159
65	0	3	0	1	J960	J159
65	0	8	0	2	N10	E86
83	1	15	1	1	J960	J159
79	0	8	0	1		I509	J159
65	0	11	0	1		T814
90	0	14	0	1		T814
67	1	19	1	1		J159
87	0	31	0	1	A419	N10
33	1	2	0	1	A409
7	1	5	0	2	N10
36	0	3	0	1	J159
85	1	22	0	1	J159	J960
85	1	4	0	2	J159	E86
85	1	6	0	3	J159
85	1	7	0	4	J159	E86
85	1	8	0	5	J159	E86
34	0	26	0	1		T814
70	0	7	0	1		J100	J189	N179
6	1	15	0	1	A410	E86	R650	R651
86	1	11	0	1	J159
67	0	5	1	1	K650	R570
48	0	5	0	1	J159
65	0	8	0	1	K810
93	0	3	0	1	J159
6	0	14	0	1	J159
80	0	7	0	1		J159
81	0	7	0	2	A415	N178
35	1	3	0	1	J09
71	1	9	0	1		A410	J853	J390
71	1	3	0	2	K650	J853
67	1	8	0	1		J189	R650
60	0	5	0	1	J157
63	1	22	0	1	J158
63	1	56	0	2	J171	J158
63	1	5	1	3		J158
65	0	7	0	1		A46
46	1	20	0	1		A419
77	0	5	0	1	J159
44	0	7	0	1		J159
46	0	19	1	1		J960	N179	A410	A413
72	0	8	0	1	A415
72	0	6	0	2		N10
87	0	11	0	1		J159	I509
64	0	6	0	1	J159
64	0	16	0	2	J159
64	0	15	0	3	J159
68	0	5	0	1		J159
86	0	6	0	1	J159
86	0	9	0	2	J159
86	0	3	0	3		J159
86	0	7	0	4		J159
81	1	3	0	1		R650
5	0	2	0	1	J09
68	1	12	0	1	J960	J158
68	1	4	0	2	J159
71	1	5	0	1		J09
72	1	7	0	2	A413	J14	I509
40	1	1	0	1	J159
53	0	5	0	1	J159
53	0	17	0	2		J159
88	0	14	1	1	J159
30	1	0	0	1	O85
61	0	4	0	1	T814
62	1	5	0	1		J159
22	1	6	0	1	J159
23	1	3	0	2	J159	E86
61	1	25	0	1	T814
54	1	36	0	1		N179	J952	J159	A411	J189
54	1	6	0	2	J952	A411
54	1	13	1	3		N179	J960	J159
31	0	13	0	1		T814
59	0	6	0	1	A419	J159
38	0	1	0	1	J159	R650
38	0	4	0	2	J159	J189	J100
60	1	14	0	1	A415	I509
58	1	5	0	1	A46	E86	N170
81	1	7	0	1	J159	I509
71	0	7	0	1	A415	J159	J189	T814
8	0	7	0	1	A46
8	0	6	0	2	A46
54	0	9	0	1		T814
54	0	13	0	2		T814
88	1	11	0	1	J159
87	0	4	1	1		A419	J189
76	1	12	0	1		J159
42	0	3	0	1	J13
71	1	17	0	1	J159
64	0	5	0	1	J159
44	0	2	0	1	J09
48	1	18	0	1	J159
75	1	4	0	1	J159
77	0	10	0	1	J159
77	0	9	0	2	J159
77	0	2	0	3	J159
80	1	8	0	1	J157
81	1	5	0	2	J158	I509
81	1	6	0	3	J159	I509
5	0	1	0	1		J159
5	1	18	0	1		J14	J159	J960
79	1	34	0	1		J159
79	1	4	0	1	J158
5	0	1	0	1	J158	E86
75	0	5	0	1	J159
90	0	9	0	1	J159
85	0	6	0	2	A415	E86
63	1	11	0	1		T814	K650
65	1	4	0	1	J159	E86
39	1	3	0	1		T814
39	1	1	0	2	T814
37	0	10	0	1	A410
38	0	5	0	2	A400	A46
73	1	8	0	1	J159	E86
87	0	18	0	1	J159
85	0	3	0	1	J159
55	0	18	0	1		N179	N10	N170
90	1	11	0	1	N179	E86	E86	I509	J392
46	0	0	0	1	J158
76	1	10	0	1	J159
62	0	12	0	1	A419
63	0	2	0	2	K810
74	1	14	1	1	J960	A410
8	0	3	0	2	N10
46	1	78	0	1		J159
69	0	3	0	1	J159	I509
60	0	5	0	1	A401	J189
61	0	14	0	2		R650
5	0	0	0	1	T814
54	1	2	0	1	A46
92	1	33	0	1	A410	J159	K810
93	1	4	0	2	A418	E86
61	1	1	0	1	J14
52	0	2	0	1	A419	E86
85	0	25	1	1	A418	J159	E86
63	0	4	0	1	T814
5	1	4	0	1	J151	T814
5	1	14	0	2	J151
36	0	4	0	1		J159
82	0	4	0	1		R651
69	1	9	0	1	J391
65	1	1	1	1	J960	J159
95	1	6	0	1	A46
69	1	51	0	1		J159
76	1	6	0	1	K810
48	1	4	0	1	A415
64	0	5	0	1	J159
64	0	0	1	2	J159
64	0	0	1	3	J159
64	0	0	1	4	J159
64	0	0	1	5	J159
41	0	8	0	1	J13
83	1	18	0	1	J159
83	1	6	0	2	J159
79	0	17	0	1	J159	E86
68	0	12	0	1	J860
86	1	5	0	1	T814
71	0	3	0	1	A419	E86
40	0	3	0	1	J159
41	0	3	0	2	A419
49	1	2	0	1	T814
86	0	5	0	1		A46
86	0	3	1	2		J159
66	1	40	0	1		J159
42	1	6	0	1		T814
85	0	8	0	1	A418	A415	I509
85	0	12	0	2	A418	E86	I509
64	0	26	0	1	J159
79	0	5	1	1	A419	N10
78	0	7	0	1		J159
78	0	16	0	2		J159
72	0	6	0	1	A419
27	0	7	0	1	A419
90	0	20	0	1	A410	N179	A419
90	0	5	0	2		N179	A411
91	0	6	0	3	A410
85	0	9	1	1		J159
52	1	10	0	1	J156
11	1	33	0	1	T814
54	1	5	0	1	J159
55	1	2	0	2	J159
93	1	4	0	1	J159
6	0	0	0	1	A419
66	0	9	0	1	J159
48	0	5	0	1	T814
48	0	1	0	2	T814
63	1	4	0	1		N10
63	1	17	0	2		N10
63	1	14	0	3	A415
57	1	2	0	1		J159
58	1	5	0	2	J159	E86
58	1	7	0	3		J159
87	0	4	1	1		J159
56	1	2	0	1	J159
54	1	2	0	1		J158
74	1	17	0	1	T814
54	0	2	0	1	J159
69	0	8	0	1		A415
66	1	23	0	1	A418	J159	J960
66	1	10	0	2	A415	J13
47	0	9	0	1	J157
47	0	1	0	2	J157	J159
47	0	1	0	3	J157
48	0	6	0	4		R650	E86
48	0	5	0	5	J159
75	0	17	0	1		J159	E86
75	0	3	0	2	N10
75	0	14	0	3	J159	E86	N179
75	0	5	0	4	J159	E86
75	0	8	0	5		A419	R650
6	1	9	0	1	J157
80	1	37	0	1	J158
80	1	6	0	2	J159
80	1	17	0	3	J159
80	1	12	0	4	J159
80	1	8	0	5	J159
63	1	2	0	1	T814
63	1	12	0	2	T814	T814
45	1	7	0	1	A46
65	0	14	0	1		J159	D691
89	0	4	0	1		A415
67	0	10	0	1		J101	J960
39	1	3	0	1	J159
84	1	5	0	1	A46
30	1	25	0	1		J159
33	1	2	0	1		J159
63	0	34	0	1	K650	T814
63	0	3	0	2	T814	N179
93	1	7	0	1	J159
93	1	2	0	2		A46
93	1	7	0	3	K810
72	0	8	0	1	I509	A415	K810
70	0	3	0	1		N10
70	0	5	0	2	J101	R650
46	0	7	0	1	A415
24	0	2	0	1	J36
77	1	6	0	1		J159
70	0	4	0	1	J159
100	1	14	0	1		J159
100	1	5	0	2	J159	I509
12	0	2	0	1	J159
[truncated: 108,205 more rows]
